# Supplementary material
Source: HighWire-hosted journal article supplement (https://erj.ersjournals.com/content/59/6/2102078)
Supplement: inline-supplementary-material-1 [file inline-supplementary-material-1.pdf]

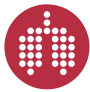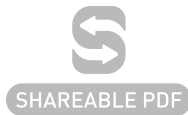

# Lung transplantation for acute respiratory distress syndrome: a retrospective European cohort study

Jens Gottlieb <sup>1,2</sup>, Philipp M. Lepper <sup>3</sup>, Cristina Berastegui<sup>4</sup>, Beatriz Montull<sup>5</sup>, Alexandra Wald<sup>6</sup>, Jasvir Parmar<sup>7</sup>, Jesper M. Magnusson <sup>8</sup>, Felix Schönrrath<sup>9</sup>, Tanel Laisaar<sup>10</sup>, Sebastian Michel<sup>11</sup>, Hillevi Larsson<sup>12</sup>, Robin Vos <sup>13,14</sup>, Assad Haneya<sup>15</sup>, Tim Sandhaus<sup>16</sup>, Erik Verschuuren<sup>17</sup>, Jérôme le Pavec<sup>18</sup>, Jussi Tikkanen<sup>19,21</sup> and Konrad Hoetzenecker<sup>20,21</sup>

<sup>1</sup>Dept of Respiratory Medicine, Hannover Medical School, Hannover, Germany. <sup>2</sup>Biomedical Research in Endstage and Obstructive Lung Disease Hannover (BREATH), Member of the German Center for Lung Research (DZL), Hannover, Germany. <sup>3</sup>Dept of Internal Medicine V – Pneumology, Allergy and Critical Care Medicine, University Hospital of Saarland, Saarland University, Homburg, Germany. <sup>4</sup>Dept of Respiratory Medicine, Lung Transplant Unit, Hospital Universitario Vall d’Hebron, Barcelona, Spain. <sup>5</sup>Dept of Respiratory Medicine and Lung Transplant Unit, Hospital Universitario y Politécnico La Fe, Valencia, Spain. <sup>6</sup>Dept of Pneumology, University Hospital Leipzig, Leipzig, Germany. <sup>7</sup>Dept of Respiratory Medicine, Royal Papworth Hospital, Cambridge Biomedical Campus, Cambridge, UK. <sup>8</sup>Dept of Respiratory Medicine, Institute of Medicine, University of Gothenburg, Transplant Institute, Sahlgrenska University Hospital, Gothenburg, Sweden. <sup>9</sup>Dept of Cardiothoracic and Vascular Surgery, German Heart Center Berlin and German Centre for Cardiovascular Research (DZHK), Partner Site Berlin, Berlin, Germany. <sup>10</sup>Dept of Thoracic Surgery and Lung Transplantation, Lung Clinic, Tartu University Hospital, Lung Clinic, Tartu University, Tartu, Estonia. <sup>11</sup>Dept of Cardiac Surgery, Ludwig Maximilian University Munich and Comprehensive Pneumology Center (CPC)-Munich, Member of the German Center for Lung Research (DZL), Munich, Germany. <sup>12</sup>Dept of Respiratory Medicine and Allergy, Skåne University Hospital, Lund, Sweden. <sup>13</sup>Dept of Respiratory Diseases, University Hospitals Leuven – Campus Gasthuisberg, Leuven, Belgium. <sup>14</sup>Laboratory of Respiratory Diseases and Thoracic Surgery (BREATHE), Dept of Chronic Diseases and Metabolism, KU Leuven, Leuven, Belgium. <sup>15</sup>Dept of Cardiac and Vascular Surgery, Campus Kiel, University Medical Center Schleswig-Holstein, Kiel, Germany. <sup>16</sup>Dept of Cardiovascular Surgery, University Hospital Jena, Jena, Germany. <sup>17</sup>Respiratory Diseases and Lung Transplantation, University Medical Center Groningen, Groningen, The Netherlands. <sup>18</sup>Service de Chirurgie Thoracique, Vasculaire et Transplantation Cardio-pulmonaire, Hôpital Marie-Lannelongue, Le Plessis-Robinson, France. <sup>19</sup>Dept of Pulmonary Medicine, Heart and Lung Center, Helsinki University Hospital, University of Helsinki, Helsinki, Finland. <sup>20</sup>Dept of Thoracic Surgery, Medical University of Vienna, Vienna, Austria. <sup>21</sup>These two authors contributed equally.

Corresponding author: Jens Gottlieb ([gottlieb.jens@mh-hannover.de](mailto:gottlieb.jens@mh-hannover.de))

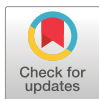

## Shareable abstract (@ERSpublications)

**Most ARDS patients are bridged by mechanical support to LTx. 40 patients were identified in 48 European centres. 31 survived until transplantation and 1-year survival was 71% after LTx. The selection process remains ethically challenging.** <https://bit.ly/3GKwPL3>

**Cite this article as:** Gottlieb J, Lepper PM, Berastegui C, *et al.* Lung transplantation for acute respiratory distress syndrome: a retrospective European cohort study. *Eur Respir J* 2022; 59: 2102078 [DOI: 10.1183/13993003.02078-2021].

This single-page version can be shared freely online.

Copyright ©The authors 2022.  
For reproduction rights and  
permissions contact  
[permissions@ersnet.org](mailto:permissions@ersnet.org)

Received: 26 July 2021  
Accepted: 27 Oct 2021

## Abstract

**Background** The published experience of lung transplantation in acute respiratory distress syndrome (ARDS) is limited. The aim of this study was to investigate the contemporary results of lung transplantation attempts in ARDS in major European centres.

**Methods** We conducted a retrospective multicentre cohort study of all patients listed for lung transplantation between 2011 and 2019. We surveyed 68 centres in 22 European countries. All patients admitted to the waitlist for lung transplantation with a diagnosis of “ARDS/pneumonia” were included. Patients without extracorporeal membrane oxygenation (ECMO) or mechanical ventilation were excluded. Patients were followed until 1 October 2020 or death. Multivariable analysis for 1-year survival after listing and lung transplantation was performed.

**Results** 55 centres (81%) with a total transplant activity of 12438 lung transplants during the 9-year period gave feedback. 40 patients with a median age of 35 years were identified. Patients were listed for lung transplantation in 18 different centres in 10 countries. 31 patients underwent lung transplantation (0.25% of all indications) and nine patients died on the waitlist. 90% of transplanted patients were on

ECMO in combination with mechanical ventilation before lung transplantation. On multivariable analysis, transplantation during 2015–2019 was independently associated with better 1-year survival after lung transplantation (OR 10.493, 95% CI 1.977–55.705;  $p=0.006$ ). 16 survivors out of 23 patients with known status (70%) returned to work after lung transplantation.

**Conclusions** Lung transplantation in highly selected ARDS patients is feasible and outcome has improved in the modern era. The selection process remains ethically and technically challenging.
